1 **Experimental evidence that female rhesus macaques (*Macaca mulatta*) perceive**  
2 **variation in male facial masculinity**

3

4 Kevin A. Rosenfield<sup>1,2\*</sup>, Stuart Semple<sup>1</sup>, Alexander V. Georgiev<sup>3,4</sup>, Dario Maestriperi<sup>4</sup>,  
5 James P. Higham<sup>5</sup>, Constance Dubuc<sup>5,6</sup>

6

7 <sup>1</sup>Centre for Research in Evolutionary, Social and Interdisciplinary Anthropology,  
8 University of Roehampton, Holybourne Avenue, London SW15 4JD, UK

9

10 <sup>2</sup>Department of Anthropology, Pennsylvania State University, 409 Carpenter Building,  
11 University Park, PA 16802, USA

12

13 <sup>3</sup>School of Natural Sciences, Bangor University, Bangor, Gwynedd, LL57 2UW, UK

14

15 <sup>4</sup>Institute for Mind and Biology, The University of Chicago, 940 East 57th St, Chicago,  
16 IL 60637, USA

17

18 <sup>5</sup>Department of Anthropology, New York University, 25 Waverly Place, New York, NY  
19 10003, USA

20

21 <sup>6</sup>Department of Zoology, University of Cambridge, Downing Street, Cambridge CB2  
22 3EJ, UK

23 *\*To whom correspondence should be addressed. E-mail: [kar61@psu.edu](mailto:kar61@psu.edu)*

24 **Abstract**

25 Among many primate species, face shape is sexually dimorphic, and male facial  
26 masculinity has been proposed to influence female mate choice and male-male  
27 competition by signalling competitive ability. However, whether conspecifics pay  
28 attention to facial masculinity has only been assessed in humans. In a study of free-  
29 ranging rhesus macaques, *Macaca mulatta*, we used a two-alternative look-time  
30 experiment to test whether females perceive male facial masculinity. We presented 107  
31 females with pairs of images of male faces – one with a more masculine shape and one  
32 more feminine – and recorded their looking behaviour. Females looked at the masculine  
33 face longer than at the feminine face in more trials than predicted by chance. Although  
34 there was no overall difference in average look-time between masculine and feminine  
35 faces across all trials, females looked significantly longer at masculine faces in a subset  
36 of trials for which the within-pair difference in masculinity was most pronounced.  
37 Additionally, the proportion of time subjects looked toward the masculine face increased  
38 as the within-pair difference in masculinity increased. This study provides evidence that  
39 female macaques perceive variation in male facial shape, a necessary condition for  
40 intersexual selection to operate on such a trait. It also highlights the potential impact of  
41 perceptual thresholds on look-time experiments.

42

43 **Keywords**

44 Sexual dimorphism, mate choice, facial masculinity, look-time experiment

## 45 **Introduction**

46 Sexual selection can shape the evolution of male secondary sex characters through the  
47 processes of intra- or intersexual selection, commonly associated with male-male contest  
48 competition and female mate choice, respectively [1]. Although intra-sexual and  
49 intersexual selection were initially believed to be independent evolutionary processes [1],  
50 a growing body of evidence now indicates that traits initially shaped by intrasexual  
51 selection - such as badges of dominance status, agonistic displays, large body size and  
52 weapons - can sometimes be used secondarily by females as cues or signals of male  
53 physical strength and competitive ability, allowing them to select optimal mating partners  
54 or avoid coercive males [2–4]. As long as inter-male variation in such traits can be  
55 perceived, females might be able to use them in their mating decisions.

56 In humans, there is good evidence that facial masculinity is associated with male-  
57 male competition: facial masculinity has been found to be positively associated with  
58 physical strength [5], testosterone levels [6,7; but see 8, in which no link was found, 9, in  
59 which testosterone reactivity to competition, but not baseline testosterone levels, were  
60 related to facial masculinity, and 10, in which neither reactivity nor baseline levels were  
61 related to facial masculinity], aggressiveness [11,12], and unethical behaviour (propensity  
62 to deceive in negotiation and cheat to increase financial gain) [13]. There is also indirect  
63 evidence that facial masculinity predicts fitness, being negatively associated with the  
64 probability of dying from contact aggression [14] and positively associated with number  
65 of short-term mating partners [15]. perceived facial masculinity and dominance are  
66 closely linked [5,16], and recent research has shown that humans find viewing male faces

67 rated as dominant as more rewarding, even when ratings of facial attractiveness are  
68 statistically controlled [17,18]. Sexually dimorphic face shape is not merely a result of  
69 ontogenetic scaling [19], suggesting that it may have been under selection independently  
70 of body size. Importantly, variation in facial masculinity is perceived by the human  
71 sensory system: it can be used to assess competitive ability [5,16], and more masculine  
72 faces appear to be more attractive to women, at least during the fertile phase of the  
73 menstrual cycle [5,20,21]. Together, this suggests that in humans, facial masculinity is  
74 under either intra- or intersexual selection, or both.

75 Previous research has shown that primates pay great attention to conspecifics' faces  
76 [22–24]. Facial shape is sexually dimorphic in many primate species (*e.g.* collared  
77 mangabeys, *Cercocebus torquatus*: [25]; rhesus macaques, *Macaca mulatta*: [26]; tufted  
78 capuchins, *Sapajus apella*: [27,28]; papionins: [29]), and, as in humans, this is not just a  
79 consequence of sexual dimorphism in body size [29]. There is evidence that male facial  
80 masculinity plays a role in male-male contest competition in tufted capuchins, *Sapajus*  
81 *apella*: in this species, there is a positive association between male facial masculinity  
82 (facial width-to height ratio) and both dominance rank [27] and assertiveness [27,30].  
83 Finally, facial masculinity may be associated with greater bite strength in male primates  
84 [19]. While there is evidence that other facial features are perceived and used for  
85 individual recognition and social decision-making in primates [31–33], whether inter-  
86 individual variation in facial masculinity is perceived by conspecifics is unknown.

87 In this study, we used an experimental approach to investigate whether free-  
88 ranging female rhesus macaques perceive variation in male facial masculinity. In this

89 species, sexual dimorphism in facial features [26] may be associated with bite strength  
90 [19]; under the assumption that bite strength is associated with success in contest  
91 competition and may reflect overall body strength, facial masculinity thus may serve as a  
92 cue of male quality or formidability to females. Therefore, we hypothesized that females  
93 would show a visual preference for more masculine male faces. Previous research using  
94 looking-time experiments has demonstrated that when conspecific faces are presented  
95 alongside other types of stimuli, such as seashells or heterospecific faces, primates show  
96 a strong conspecific bias [34–39]. To test this hypothesis, we presented adult females  
97 with pairs of photographs of faces of adult males, whose facial masculinity we quantified,  
98 in order to test two predictions: (1) females will have a higher overall looking time  
99 towards the more masculine male face of the pair, and (2) the proportion of time spent  
100 looking at the more masculine face will be positively related to the difference in  
101 masculinity between the two faces presented.

102

## 103 **Methods**

### 104 *Study population*

105 We studied rhesus macaques on Cayo Santiago, a 15.2-hectare island 1 km off the eastern  
106 coast of Puerto Rico, managed by the Caribbean Primate Research Centre (CPRC) of the  
107 University of Puerto Rico. The population of ca. 1,300 - 1,400 macaques living on the  
108 island at the time of the study is descended from a group of 409 individuals brought from  
109 India in 1938 [40]. Animals are individually recognizable, with tattoos providing a

110 unique ID and ear notches given when they are yearlings. Dates of birth of all animals are  
111 available from long-term records.

112

### 113 *Facial sexual dimorphism measurement*

114 To quantify sexual dimorphism in face shape, we measured facial images of male  
115 (N=69) and female (N=27) rhesus macaques, collected during the 2012 and 2013 mating  
116 season following a previously described method [41]. Multiple images of males were  
117 captured in RAW format from 1–3 m away from subjects using a calibrated Canon EOS  
118 Rebel T2i camera with an 18-megapixel CMOS APS sensor and an EF-S 55–250 mm  
119 f/4–5.6 IS lens. In order to obtain an image of the male looking straight at the camera, we  
120 placed a red plastic apple immediately above the camera lens to attract their attention,  
121 and collected several images in a row using the burst function, enabling us to select the  
122 most forward-facing image from the series. Immediately after the capture of an image,  
123 we took a photograph of a colour standard (X-rite ColourChecker passport) placed in the  
124 same location and photographed under the same lighting as the subjects (*i.e.*, the  
125 “sequential method”: [42–45]).

126 For analysis, we chose only images of fully adult males (median age = 9 years;  
127 range = 8–16 years; N=69) and females (median age = 9 years; range = 8–14 years; N=27)  
128 looking directly towards the camera. For each image, we digitally measured the sizes of  
129 eight facial features in GIMP 2013, as depicted in Fig. 1, and scaled the length of each  
130 feature by dividing it by head height (hereafter, relative size). We then compared male  
131 and female relative feature sizes using either Mann-Whitney U or independent samples t-

132 tests, depending on normality of the data distribution (See Table 1). The relative sizes of  
133 five features (lower face height, jaw width, temporalis height, jaw height, nose length)  
134 were larger in male faces, while two features (interpupil distance, face width) did not  
135 differ significantly between the sexes, and one feature (eye height) was significantly  
136 larger in female faces. We then ran a multiple linear regression model with each facial  
137 feature as a predictor variable and sex as the independent variable. We saved the  
138 unstandardised predicted variables for use as facial masculinity scores for each male and  
139 female image. The derived male (mean  $\pm$  SE =  $1.91 \pm 0.026$ ) and female (mean  $\pm$  SE  
140 =  $1.22 \pm 0.039$ ) facial masculinity scores differed significantly (Mann-Whitney U = 10.0,  
141  $P < 0.001$ ).

142

143 -----Insert Figure 1 approximately here-----

144

145 -----Insert Table 1 approximately here-----

146

#### 147 *Stimulus preparation*

148 Using the masculinity scores described above, we selected as stimuli in experimental  
149 trials the 10 most masculine and 10 most feminine facial images (hereafter masculine  
150 images and feminine images, respectively) that did not contain any distracting elements,  
151 such as wounds, discolouration of the facial skin or hair, other monkeys, or food. We  
152 only selected images of males displaying neutral expressions, to eliminate the influence  
153 of threatening or other facial expressions [46] on subjects' looking behaviour.

154 We printed stimuli onto matte photo paper (Staples Photo Supreme) using a  
155 colour-calibrated printer (Canon Pixma Pro 100), and measured the printed face colour  
156 using a Xrite ColourMunki spectrophotometer (see [31]). Pictures were printed on letter  
157 format paper (21.5 cm × 28.9 cm), with printed images of a dimension of 18.5 cm × 18.5  
158 cm, in such a way that face length was 17 cm.

159

### 160 *Experimental design*

161 To test for female preference for male facial masculinity, we used a look-time paradigm  
162 that has been used successfully to test interest towards other facial features in this study  
163 species [31,46–49]. Each test pair consisted of one masculine and one feminine image,  
164 selected randomly from the set of 10 stimuli in each category. KR and one assistant  
165 conducted trials on weekdays from 18 March to 29 April 2015, between 09:00 and 13:00  
166 h. The stimuli were placed in frames built into an experimental apparatus, such that they  
167 were 85 cm apart at their centres (the apparatus measured 50 x 120 cm; Fig. 2). The  
168 relative position of the images in the frame – whether the masculine image was on the  
169 right or left – was randomised. Prior to trials, the stimuli were covered by occluders.  
170 Potential trial subjects available on Cayo Santiago were all females  $\geq 3$  years old (N=476  
171 at time of study). We tested 167 of these potential subjects, each being tested only once.  
172 We discarded 60 trials that lasted less than 15 s, or during which it was not possible to  
173 determine which image the subject was looking toward at any point. This left 107 trials,  
174 one from each of 107 subjects (median age = 8 years). Females were not retested if they  
175 participated in failed trials, and females that saw stimuli when they were not being tested



176 were also identified and were not tested in future trials. Females who were near adult  
177 males, sleeping, or grooming other adults were not tested.

178 For testing, we placed the experimental apparatus 2-3 m in front of a female and  
179 started recording her behaviour on video (Fig. 2). To determine the location of the stimuli  
180 in relation to the subject's eyes (for video coding), we directed her visual attention  
181 toward the location of the covered stimuli by tapping on the occluders (in randomised  
182 order). We then directed her attention away from either stimulus by tapping on the centre  
183 of the apparatus, and removed the occluders to reveal the stimuli. Trials lasted for 30  
184 seconds after removal of the occluders, unless the subject moved away or engaged

185

186 -----Insert Figure 2 approximately here-----

187

188 socially with another monkey. We used MPEG Streamclip for Mac to code only the first  
189 15 seconds (following removal of occluders) of trial videos frame-by-frame, because  
190 most subjects stopped looking at either stimulus before the 15<sup>th</sup> second. During coding,  
191 we assessed the total amount of time spent looking at the masculine image and at the  
192 feminine image. To eliminate the possibility of coding bias, we coded all trials blind to  
193 condition (*i.e.* on which side the masculine image was located).

194

#### 195 *Potential confounds of facial masculinity*

196 In order to test for possible confounding effects of other male traits, such as age  
197 and facial colouration, on stimulus image masculinity, we used Spearman's rank

198 correlations and Mann-Whitney test. Male age was taken from the long-term records of  
199 CRPC. Age and masculinity were not correlated among the males used as experimental  
200 stimuli ( $r_s = 0.075$ ,  $N = 20$ ,  $P = 0.754$ ), and males used in masculine male images ( $N =$   
201  $10$ , median age =  $10$ ) were not older than more feminine males ( $N = 10$ ; median age =  $9$ ;  
202 Mann-Whitney  $U = 39.5$ ,  $P = 0.421$ ). To quantify facial colour and luminance, we took  
203 red (R), green (G) and blue (B) measurements from the stimuli and, based on the  
204 processing of colours early in the primate visual pathway, calculated redness as the Red–  
205 Green Opponency Channel,  $(R - G)/(R + G)$ , and darkness as the Luminance  
206 (achromatic) Channel  $(R + G)/2$  [46]. Neither facial colour ( $r_s = -0.138$ ,  $N = 20$ ,  $P =$   
207  $0.559$ ) nor facial luminance ( $r_s = 0.339$ ,  $N = 20$ ,  $P = 0.143$ ) was correlated with facial  
208 masculinity in the stimulus set. Furthermore, masculine ( $N = 10$ , median colour =  $0.087$ ,  
209 median luminance =  $167.75$ ) and feminine males ( $N = 10$ , median colour =  $0.097$ , median  
210 luminance =  $145.13$ ) did not differ in facial colour ( $U = 44$ ,  $P = 0.684$ ) or luminance ( $U =$   
211  $71.5$ ,  $P = 0.11$ ). We thus concluded that any difference in the looking behaviour of our  
212 subjects toward masculine and feminine stimuli would be independent of the effects of  
213 male age or facial colour.

214 We also checked for confounding effects of stimulus males' familiarity to  
215 females. Our operational definition of familiarity was group co-membership. Therefore,  
216 using Mann-Whitney tests, we compared the proportion of trial time subjects looked at  
217 masculine stimuli when they were groupmates with neither stimulus male ( $N=76$ ) to trials  
218 in which they were groupmates of the masculine stimulus male ( $N=14$ ), the feminine  
219 stimulus male ( $N=10$ ) and both ( $N=7$ ). All results were non-significant (masculine vs.

220 neither:  $U = 543.5$ ,  $P = 0.903$ ; feminine vs. neither:  $U = 378$ ,  $P = 0.983$ ; both vs. neither:  
221  $U = 345$ ,  $P = 0.198$ ), indicating that group co-membership did not influence subjects'  
222 looking behaviour.

223

#### 224 *Data analysis*

225 To test the prediction that females would look longer at the more masculine face of the  
226 pair, we undertook two analyses. First, we compared females' duration of looking  
227 towards the masculine and feminine images using Wilcoxon signed-rank tests. Secondly,  
228 we compared the number of trials in which females looked longer at the masculine vs.  
229 feminine stimuli to the value expected by chance (0.5) using a binomial test.

230 We also used two approaches to test the prediction that the proportion of time  
231 spent looking at the more masculine face would be positively related to the difference in  
232 masculinity between the two faces presented. Firstly, we calculated the relative difference  
233 between the masculinity scores of the masculine and feminine image for each trial as  
234 follows:  $((\text{masculine image score} - \text{feminine image score}) / \text{feminine image score}) \times 100$ ,  
235 with higher scores indicating larger disparities between the two images. We then ran a  
236 linear model with percentage of total look-time spent looking at the masculine image  
237 (relative look-time score) as the dependent variable, and relative facial masculinity score  
238 as the predictor variable. As relative masculinity may be related to absolute masculinity,  
239 we ran an additional linear model, this time entering both relative and absolute facial  
240 masculinity score (of the more masculine image) as predictors.

241           Secondly, to further examine the salience of differences in facial masculinity, we  
242 separated the dataset into two groups – one containing the 53 trials with the lowest  
243 relative facial masculinity scores, the other containing the 54 trials with the highest scores  
244 (results were identical if we used the lowest 54 and the highest 53 trials). We then used  
245 Wilcoxon signed-rank tests to compare females’ duration of look-time towards the  
246 masculine and feminine images in each group. Statistical tests were two-tailed and  
247 performed using IBM SPSS Statistics for Mac (21.0);  $\alpha$  was set at 0.05.

248

## 249 **Results**

250 *Prediction 1 - females will look longer at the more masculine male face of the pair*

251           Subjects’ median overall look-time was 4.72 s, or 31% of the 15-s trial period.  
252 When all trials were included in the analysis, median looking time for masculine images  
253 (2.24 s; IQR = 1.31 – 3.45 s) did not differ from that for feminine images (2.24 s; IQR =  
254 1.07 – 3.43s; Wilcoxon signed-rank test:  $Z = -0.799$ ,  $N = 107$ ,  $P = 0.424$ ; Fig. 3).  
255 However, subjects did look longer at the masculine than the feminine image in a  
256 significantly higher proportion of trials than expected by chance (looked longer at  
257 masculine image: 64 trials; looked longer at feminine image: 41 trials; 2 ties. Binomial  
258 test:  $p = 0.031$ ).

259

260 -----Insert Figure 3 approximately here-----

261

262 *Prediction 2 - the proportion of time spent looking at the more masculine face will be*  
263 *positively related to the difference in masculinity between the two faces presented*

264 Trials' relative facial masculinity scores ranged from 12.1% to 61.4%, and  
265 variation in these scores explained a small but significant proportion of variation in  
266 relative look time scores ( $\beta = 0.29$ , 95% CI=0.03-0.55,  $p = 0.03$ , adjusted  $R_2 = 0.035$ ;  
267 Fig. 4). In other words, the greater the within-trial disparity in masculinity scores, the  
268 stronger the bias toward masculine images. The relationship between relative masculinity  
269 and relative look time remained significant when absolute masculinity scores were  
270 included in the model ( $\beta = 0.379$ , 95% CI=0.06-0.70,  $p = 0.021$ ), and there was no  
271 additional influence of absolute masculinity on relative look times ( $\beta = -0.179$ , 95%  
272 CI=0.54-0.192,  $p = 0.34$ ; total model:  $F [2,104] = 2.9$ , adjusted  $R_2 = 0.034$ ,  $p = 0.06$ ).

273

274 -----Insert Figure 4 approximately here-----

275

276 Having separated trials into high ( $N = 54$ ; mean  $\pm$  SE =  $42.7 \pm 0.75\%$ ) and low ( $N$   
277 =  $53$ ; mean  $\pm$  SE =  $22.7 \pm 1.14\%$ ) relative masculinity score groups, we found that in the  
278 low-differences group, subjects' look-times did not differ between masculine (median =  
279 2.41 s; IQR = 1.48 – 3.66 s) and feminine images (median = 2.41 s; IQR = 1.17 – 3.97 s;  
280 Wilcoxon signed-rank test:  $Z = -1.28$ ,  $N = 53$ ,  $P = 0.201$ ; Fig. 5), while in the high-  
281 differences group, subjects looked significantly longer at masculine than feminine images  
282 (masculine median = 1.86 s; IQR = 1.28 – 2.87 s; feminine median = 1.48 s; IQR = 1.04

283 – 3.23 s; Wilcoxon signed-rank test:  $Z = -2.421$ ,  $N = 54$ ,  $P = 0.015$ ; Cohen's  $d = 0.54$ ; Fig  
284 5).

285

286 -----Insert Figure 5 approximately here-----

287

## 288 **Discussion**

289 Using a two-alternative experimental look-time paradigm, we tested the hypothesis that  
290 free-ranging female rhesus macaques perceive variation in male facial masculinity. In  
291 partial support of our prediction that females would look longer at the more masculine  
292 male face of the pair, test subjects looked longer at masculine than feminine male faces  
293 when the difference in masculinity between the two was high. Moreover, as predicted, the  
294 proportion of time spent looking at the more masculine face was positively related to the  
295 difference in masculinity between the two faces presented. No relationships were found  
296 between male facial masculinity and either male age or facial colour, and female look-  
297 time did not appear to be related to familiarity to the test subject, ruling out these as  
298 potential confounds of our key results. Overall, this study provides evidence from a non-  
299 human species that variation in male facial shape, specifically variation along a feminine-  
300 masculine continuum, is salient to female conspecifics.

301       The finding that females distributed their visual attention unevenly between  
302 masculine and feminine faces indicates that the variation in facial masculinity we  
303 measured was not only perceived by, but also salient to female rhesus macaques. It is  
304 possible that variation in facial masculinity has no reliable connection to underlying

305 physiological, behavioural or genetic factors in male rhesus macaques, in which case  
306 there may be no fitness repercussions of female attention to such variation. However, as  
307 male facial masculinity is related to hormone levels and behaviour in humans and other  
308 primates [*e.g.*, 7,43], it seems likely that females' ability to discriminate variation in this  
309 trait is the result of evolutionary processes.

310 Work to date has indicated that the development of facial masculinity in humans  
311 is under the control of testosterone [6,7, but see 10, which failed to replicate this  
312 relationship] and is linked to aggressiveness and competitive ability in humans and non-  
313 human primates [11,27,30]. As such, it is possible that females gain from paying  
314 attention to male facial masculinity because it provides information about the risks of  
315 aggression males may present; this explanation has also been proposed to underlie the  
316 attentional bias shown for threat grins documented in this species [46,48]. A non-  
317 mutually exclusive possibility is that females are attracted to facial masculinity in a  
318 sexual context; a preference for males with more masculine faces as mating partners may  
319 benefit females if this trait is an honest cue of male genetic quality and health. According  
320 to the immuno-competence handicap hypothesis, testosterone-dependent traits can  
321 provide information about male quality because androgens are immunosuppressive [51].  
322 Since the development of facial masculinity is under the control of testosterone, high  
323 facial masculinity could therefore be a cue to male quality that is available to females.  
324 Since visual attentional biases can be underpinned by both attraction and fear (reviewed  
325 in [49]), more work is needed to establish whether female perception of variation in male  
326 facial features does translate into higher reproductive output for males with more

327 masculine faces, such that female mate choice would play a positive role in maintaining  
328 male facial masculinity in this species.

329 Our finding that subjects' responses to experimental stimuli depended on relative  
330 differences in masculinity highlights the importance of considering aspects of receiver  
331 psychology in studies such as this one. We suggest two potential explanations for the  
332 positive association between masculinity differences and subjects' visual bias toward  
333 masculine faces. First, the differential responses may have been associated with subjects'  
334 ability to perceive differences in masculinity. A critical feature of signals and cues is that  
335 the information they are hypothesised to convey can only alter receiver behaviour if  
336 receivers are able to perceive the differences exhibited by emitters [52]; small differences  
337 may simply not be discernible. Second, subjects may effectively perceive differences  
338 even when small, but such differences may not be sufficient to motivate a differential  
339 response; other features, such as skin colouration or texture, may overshadow masculinity  
340 differences when they are small.

341 The effects seen in the present study may represent responses to low-level features  
342 (i.e. more elementary features of the scenes presented in our stimuli, such as local colour,  
343 luminance or contrast) [53]. In this case, such effects might be seen as the perceptual  
344 mechanism by which rhesus macaques are stimulated by masculine facial traits. Such  
345 effects would require that low-level features are systematically linked to facial  
346 masculinity for them to result in the pattern we observed.

347 Our study did not attempt to disentangle the potential reasons for the visual biases  
348 we observed, but these are important avenues for future investigation. Studies of female



349 rhesus macaque mating behaviour in relation to male characteristics, like those conducted  
350 by Manson [54], Dubuc *et al.* [41], and Georgiev *et al.* [55] are needed to determine  
351 whether females' bias in visual attention towards more masculine faces translates into  
352 differences in mating and reproductive success. Another important avenue for research is  
353 to assess the potential information content of facial shape by investigating the  
354 behavioural, physiological, morphological, and genetic correlates of facial masculinity.  
355 Finally, as there is evidence that male facial colouration plays an important role in female  
356 mate choice in this species [31,41,56], a more comprehensive analysis of the relationship  
357 between facial masculinity and facial colouration is needed to better understand how  
358 different facial features, and the interaction between them, may shape female preferences.

359

#### 360 **Ethics statement**

361

362 The study was approved by the IACUC of the University of Puerto Rico, Medical  
363 Sciences Campus (protocol No. A0100108). All applicable international, national, and/or  
364 institutional guidelines for the care and use of animals (in particular non-human primates)  
365 were followed. All procedures performed involving animals were in accordance with the  
366 ethical standards of the institution(s) at which the study was conducted.

367

#### 368 **Data accessibility**

369 All data and code related to this study have been: 1) Submitted as electronic  
370 supplementary materials accompanying the manuscript, 2) Submitted to Biorxiv along  
371 with manuscript preprint at <https://www.biorxiv.org/content/early/2017/11/21/222810>  
372 3) Uploaded to Dryad data repository; review link:  
373 <http://datadryad.org/review?doi=doi:10.5061/dryad.k79v6>; Temporary Dryad DOI  
374 (pending manuscript acceptance): doi:10.5061/dryad.k79v6

375

### 376 **Competing interests**

377

378 The authors declare that they have no financial or non-financial competing interests. The  
379 content of this publication is solely the responsibility of the authors and does not  
380 necessarily represent the official views of any of the agencies and organizations that  
381 provided research and funding support.

382

### 383 **Authors' contributions**

384

385 KR conceived, designed, and coordinated the study, measured facial masculinity,  
386 performed experiments and statistical analyses, and drafted the manuscript; SS helped  
387 design and coordinate the study, carry out statistical analyses, and draft the manuscript;  
388 AG and DM helped coordinate the study, and draft the manuscript; JH printed stimulus  
389 images, and helped coordinate the study and draft the manuscript; DC collected the

390 stimulus images, and helped design and coordinate the study, carry out statistical  
391 analyses, and draft the manuscript. All authors gave final approval for publication.

392

### 393 **Acknowledgements**

394

395 We would like to thank the staff of the Caribbean Primate Research Centre (CPRC) for  
396 assistance in data collection and logistics. Dr. Peter Shaw assisted with the calculation of  
397 composite masculinity scores. Sandra Winters helped with image printing at NYU. Field  
398 assistance was provided by Severin Mortensen and Maricris Herrera.

399

### 400 **Funding Statement**

401

402 The CPRC is supported by NIH grant number 8 P40 OD012217 from the National Centre  
403 for Research Resources (NCRR) and the Office of Research Infrastructure Programs  
404 (ORIP). Funding for AVG was provided by The Leakey Foundation, the American  
405 Society of Primatologists and the International Primatological Society. Stimuli were  
406 produced using funding to JH from NYU.

407

### 408 **References**

409

- 410 1. Andersson MB. 1994 *Sexual Selection*. Princeton: Princeton University Press.
- 411 2. Berglund A, Pilastro A. 1996 Armaments and ornaments: an evolutionary

- 412 explanation of traits of dual utility. *Biol. J. Linn. Soc.* **58**, 385–399.
- 413 3. Hunt J, Breuker CJ, Sadowski JA, Moore AJ. 2009 Male–male competition,  
414 female mate choice and their interaction: determining total sexual selection. *J.*  
415 *Evol. Biol.* **44**, 13–26. (doi:10.1111/j.1420-9101.2008.01633.x)
- 416 4. Pradhan GR, Schaik C Van. 2017 Infanticide-driven intersexual conflict over  
417 matings in primates and its effects on social organization. *Behaviour* **145**, 251–  
418 275.
- 419 5. Windhager S, Schaefer K, Fink B. 2011 Geometric morphometrics of male facial  
420 shape in relation to physical strength and perceived attractiveness, dominance, and  
421 masculinity. *Am. J. Hum. Biol.* **23**, 805–814. (doi:10.1002/ajhb.21219)
- 422 6. Verdonck A, Gaethofs M, Carels C, de Zegher F. 1999 Effect of low-dose  
423 testosterone on craniofacial growth in boys with delayed puberty. *Eur. J. Orthod.*  
424 **21**, 137–143.
- 425 7. Penton-Voak IS, Chen JY. 2004 High salivary testosterone is linked to masculine  
426 male facial appearance in humans. *Evol. Hum. Behav.* **25**, 229–241.  
427 (doi:10.1016/j.evolhumbehav.2004.04.003)
- 428 8. Hodges-Simeon CR, Sobraske KNH, Samore T, Gurven M, Gaulin SJC. 2016  
429 Facial width-to-height ratio (fWHR) Is not associated with adolescent testosterone  
430 levels. *PLoS One* , 1–17. (doi:10.1371/journal.pone.0153083)
- 431 9. Pound N, Penton-Voak IS, Surridge AK. 2009 Testosterone responses to  
432 competition in men are related to facial masculinity. *Proc. R. Soc. B Biol. Sci.* **276**,  
433 153–159. (doi:10.1098/rspb.2008.0990)

- 434 10. Bird BM, Cid Jofré VS, Geniole SN, Welker KM, Zilioli S, Maestripieri D,  
435 Arnocky S, Carré JM. 2016 Does the facial width-to-height ratio map onto  
436 variability in men's testosterone concentrations? *Evol. Hum. Behav.* **37**, 392–398.  
437 (doi:10.1016/j.evolhumbehav.2016.03.004)
- 438 11. Carre JM, McCormick CM. 2008 In your face: facial metrics predict aggressive  
439 behaviour in the laboratory and in varsity and professional hockey players. *Proc.*  
440 *R. Soc. B Biol. Sci.* **275**, 2651–2656. (doi:10.1098/rspb.2008.0873)
- 441 12. Zilioli S, Sell AN, Stirrat M, Jagore J, Vickerman W, Watson N V. 2015 Face of a  
442 fighter: Bizygomatic width as a cue of formidability. *Aggress. Behav.* **41**, 322–330.  
443 (doi:10.1002/ab.21544)
- 444 13. Haselhuhn MP, Wong EM, Haselhuhn MP, Wong EM. 2012 Bad to the bone:  
445 facial structure predicts unethical behaviour. *Proc. R. Soc. B Biol. Sci.* **279**, 571–  
446 576.
- 447 14. Stirrat M, Stulp G, Pollet T V. 2012 Male facial width is associated with death by  
448 contact violence: narrow-faced males are more likely to die from contact violence.  
449 *Evol. Hum. Behav.* **33**, 551–556. (doi:10.1016/j.evolhumbehav.2012.02.002)
- 450 15. Rhodes G, Simmons LW, Peters M. 2005 Attractiveness and sexual behavior:  
451 Does attractiveness enhance mating success? *Evol. Hum. Behav.* **26**, 186–201.  
452 (doi:10.1016/j.evolhumbehav.2004.08.014)
- 453 16. Mileva VR, Cowan ML, Cobey KD, Knowles KK, Little AC. 2014 In the face of  
454 dominance: Self-perceived and other-perceived dominance are positively  
455 associated with facial-width-to-height ratio in men. *Pers. Individ. Dif.* **69**, 115–

- 456 118.
- 457 17. Morrison D, Wang H, Hahn AC, Jones BC, DeBruine LM. 2017 Predicting the  
458 reward value of faces and bodies from social perception. *PLoS One* **12**, 1–11.  
459 (doi:10.1371/journal.pone.0185093)
- 460 18. Wang H, Hahn AC, DeBruine LM, Jones BC. 2016 The motivational salience of  
461 faces is related to both their valence and dominance. *PLoS One* **11**, 1–7.  
462 (doi:10.1371/journal.pone.0161114)
- 463 19. Weston EM, Friday AE, Liò P. 2007 Biometric evidence that sexual selection has  
464 shaped the hominin face. *PLoS One* **2**. (doi:10.1371/journal.pone.0000710)
- 465 20. Penton-Voak IS, Perrett DI. 2000 Female preference for male faces changes  
466 cyclically: Further evidence. *Evol. Hum. Behav.* **21**, 39–48. (doi:10.1016/S1090-  
467 5138(99)00033-1)
- 468 21. Penton-Voak IS, Perrett DI, Castles DL, Kobayashi T, Burt DM, Murray LK,  
469 Minamisawa R. 1999 Menstrual cycle alters face preference. *Nature* **399**, 741–742.
- 470 22. Pascalis O, Bachevalier J. 1998 Face recognition in primates: a cross-species  
471 study. *Behav. Processes* **43**, 87–96.
- 472 23. Leopold DA, Rhodes G. 2010 A comparative view of face perception. *J. Comp.*  
473 *Psychol.* **124**, 233–251. (doi:10.1037/a0019460.A)
- 474 24. Parr LA. 2011 The evolution of face processing in primates. *Philos. Trans. R. Soc.*  
475 *B Biol. Sci.* , 1764–1777. (doi:10.1098/rstb.2010.0358)
- 476 25. O’Higgins P, Jones N. 1998 Facial growth in *Cercocebus torquatus*: an application  
477 of three-dimensional geometric morphometric techniques to the study of

- 478 morphological variation. *J. Anat.* **193**, 251–272.
- 479 26. Little AC, Jones BC, Waitt C, Tiddeman BP, Feinberg DR, David I, Apicella CL,  
480 Marlowe FW. 2008 Symmetry is related to sexual dimorphism in faces: Data  
481 across culture and species. *PLoS One* **3**, 1–8. (doi:10.1371/journal.pone.0002106)
- 482 27. Lefevre CE, Lewis GJ. 2014 Perceiving aggression from facial structure: Further  
483 evidence for a positive association with facial width-to-height ratio and  
484 masculinity, but not for moderation by self-reported dominance. *Eur. J. Pers.* **28**,  
485 530–537. (doi:10.1002/per.1942)
- 486 28. O’Higgins P, Chadfield P, Jones N. 2001 Facial growth and the ontogeny of  
487 morphological variation within and between the primates *Cebus apella* and  
488 *Cercocebus*. *J. Zool. Soc. London* **254**, 337–357.
- 489 29. O’Higgins P, Collard M. 2002 Sexual dimorphism and facial growth in papionin  
490 monkeys. *J. Zool.* **257**, 255–272. (doi:10.1017/S0952836902000857)
- 491 30. Wilson V, Lefevre CE, Morton FB, Brosnan SF, Paukner A, Bates TC. 2014  
492 Personality and facial morphology: Links to assertiveness and neuroticism in  
493 capuchins (*Sapajus* [*Cebus*] *apella*). *Pers. Individ. Dif.* **58**, 89–94.  
494 (doi:10.1038/jid.2014.371)
- 495 31. Dubuc C, Allen WL, Cascio J, Lee DS, Maestripieri D, Petersdorf M, Winters S,  
496 Higham JP. 2016 Who cares? Experimental attention biases provide new insights  
497 into a mammalian sexual signal. *Behav. Ecol.* **27**, 68–74.  
498 (doi:10.1093/beheco/arv117)
- 499 32. Deaner RO, Khera A V, Platt ML, Carolina N, Carolina N, Carolina N. 2005

- 500 Monkeys pay per view: Adaptive valuation of social images by rhesus macaques.  
501 *Curr. Biol.* **15**, 543–548. (doi:10.1016/j.cub.2005.01.044)
- 502 33. Micheletta J, Whitehouse J, Parr LA, Waller BM. In press. Facial expression  
503 recognition in crested macaques (*Macaca nigra*).
- 504 34. Hughes KD, Higham JP, Allen WL, Elliot AJ, Hayden BY. 2015 Extraneous color  
505 affects female macaques' gaze preference for photographs of male conspecifics.  
506 *Evol. Hum. Behav.* **36**, 25–31. (doi:10.1016/j.evolhumbehav.2014.08.003)
- 507 35. Taubert J, Wardle SG, Flessert M, Leopold DA, Ungerleider LG. 2017 Face  
508 Pareidolia in the Rhesus Monkey. *Curr. Biol.* **27**, 2505–2509.e2.  
509 (doi:10.1016/j.cub.2017.06.075)
- 510 36. Hattori Y, Kano F, Tomonaga M. 2010 Differential sensitivity to conspecific and  
511 allospecific cues in chimpanzees and humans: A comparative eye-tracking study.  
512 *Biol. Lett.* **6**, 610–613. (doi:10.1098/rsbl.2010.0120)
- 513 37. Demaria C, Thierry B. 1988 Responses to animal stimulus photographs in  
514 stumptailed macaques (*Macaca arctoides*). *Primates* **29**, 237–244.  
515 (doi:10.1007/BF02381125)
- 516 38. Sanefuji W, Wada K, Yamamoto T, Mohri I, Taniike M. 2014 Development of  
517 preference for conspecific faces in human infants. *Dev. Psychol.* **50**, 979–985.  
518 (doi:10.1037/a0035205)
- 519 39. Fujita K. 1987 Species recognition by five macaque monkeys. *Primates* **28**, 353–  
520 366. (doi:10.1007/BF02381018)
- 521 40. Rawlins RG, Kessler MJ. 1986 *The Cayo Santiago macaques: history, behavior,*



- 522           *and biology*. State New York Press.
- 523    41.    Dubuc C, Allen WL, Maestriperi D, Higham JP. 2014 Is male rhesus macaque red  
524           color ornamentation attractive to females? *Behav. Ecol. Sociobiol.* **68**, 1215–1224.  
525           (doi:10.1021/nl061786n.Core-Shell)
- 526    42.    Dubuc C, Brent LNJ, Accamando AK, Gerald MS, MacLarnon A, Semple S,  
527           Heistermann M, Engelhardt A. 2009 Sexual skin color contains information about  
528           the timing of the fertile phase in free-ranging macaca mulatta. *Int. J. Primatol.* **30**,  
529           777–789. (doi:10.1007/s10764-009-9369-7)
- 530    43.    Higham JP, Pfefferle D, Heistermann M, Maestriperi D, Stevens M. 2013  
531           Signaling in multiple modalities in male rhesus macaques: sex skin coloration and  
532           barks in relation to androgen levels , social status , and mating behavior. , 1457–  
533           1469. (doi:10.1007/s00265-013-1521-x)
- 534    44.    Bergman TJ, Beehner JC. 2008 A simple method for measuring colour in wild  
535           animals□: validation and use on chest patch colour in geladas ( *Theropithecus ...* A  
536           simple method for measuring colour in wild animals□: validation and use on chest  
537           patch colour in geladas. *Biol. J. Linn. Soc.* **94**, 231–240. (doi:10.1111/j.1095-  
538           8312.2008.00981.x)
- 539    45.    Stevens M, Stoddard MC, Higham JP. 2009 Studying primate color: Towards  
540           visual system-dependent methods. *Int. J. Primatol.* **30**, 893–917.  
541           (doi:10.1007/s10764-009-9356-z)
- 542    46.    Bethell EJ, Holmes A, MacLarnon A, Semple S. 2012 Evidence that emotion  
543           mediates social attention in rhesus macaques. *PLoS One* **7**.

- 544 (doi:10.1371/journal.pone.0044387)
- 545 47. Higham JP, Hughes KD, Brent LJM, Dubuc C, Engelhardt A, Heistermann M,  
546 Maestriperi D, Santos LR, Stevens M. 2011 Familiarity affects the assessment of  
547 female facial signals of fertility by free-ranging male rhesus macaques. *Proc. R.  
548 Soc. B Biol. Sci.* **278**, 3452–8. (doi:10.1098/rspb.2011.0052)
- 549 48. Mandalaywala TM, Parker KJ, Maestriperi D. 2014 Early experience affects the  
550 strength of vigilance for threat in rhesus monkey infants. *Psychol. Sci.* **25**, 1893–  
551 1902. (doi:10.1177/0956797614544175)
- 552 49. Winters S, Dubuc C, Higham JP. 2015 Perspectives: The Looking Time  
553 Experimental Paradigm in Studies of Animal Visual Perception and Cognition.  
554 *Ethology* **121**, 625–640. (doi:10.1111/eth.12378)
- 555 50. Carré JM. 2014 Social status, facial structure, and assertiveness in brown capuchin  
556 monkeys. *Front. Psychol.* **5**, 1–3. (doi:10.3389/fpsyg.2014.00567)
- 557 51. Folstad I, Karter AJ. 1992 Parasites, bright males, and the immunocompetence  
558 handicap. *Am. Nat.* **139**, 603–622.
- 559 52. Stevens M, Párraga CA, Cuthill IC, Partridge JC, Troscianko TOMS, Psychology  
560 E, Road W, Bs B. 2007 Using digital photography to study animal coloration. *Biol.  
561 J. Linn. Soc.* **90**, 211–237.
- 562 53. Groen IIA, Silson EH, Baker CI. 2017 Contributions of low-and high-level  
563 properties to neural processing of visual scenes in the human brain.  
564 (doi:10.1098/rstb.2016.0102)
- 565 54. Manson JH, Rica C. 1992 Measuring female mate choice in Cayo Santiago rhesus

- 566 macaques. *Anim. Behav.* **44**, 405–416.
- 567 55. Georgiev A V., Muehlenbein MP, Prall SP, Thompson ME, Maestripieri D. 2015  
568 Male quality, dominance rank, and mating success in free-ranging rhesus  
569 macaques. *Behav. Ecol.* **26**, 763–772. (doi:10.1093/beheco/arv008)
- 570 56. Dubuc C, Ruiz-Lambides A, Widdig A. 2014 Variance in male lifetime  
571 reproductive success and estimation of the degree of polygyny in a primate. *Behav.*  
572 *Ecol.* **25**, 878–889. (doi:10.1093/beheco/aru052)
- 573

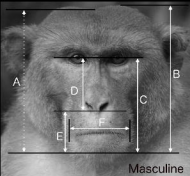

Masculine

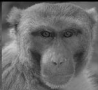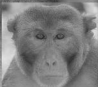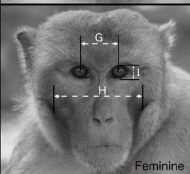

Feminine

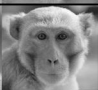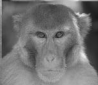

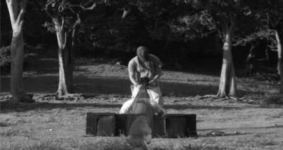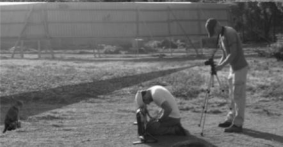

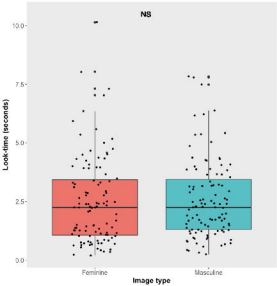

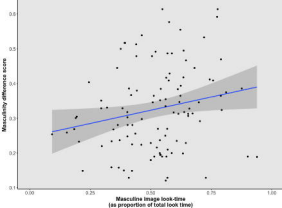

# Low differences

Load-time (seconds)

NS

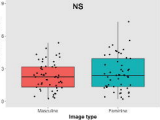

# High differences

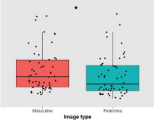



| Features (scaled to head height) | Male Mean $\pm$ SD | Female Mean $\pm$ SD | Test Statistic | P-value |
|----------------------------------|--------------------|----------------------|----------------|---------|
| Lower face height                | 0.633 $\pm$ 0.025  | 0.599 $\pm$ 0.022    | T = -6.03      | <0.001  |
| Jaw width                        | 0.391 $\pm$ 0.020  | 0.366 $\pm$ 0.030    | T = -4.84      | <0.001  |
| Temporalis height                | 1.016 $\pm$ 0.011  | 1.003 $\pm$ 0.006    | U = 288        | <0.001  |
| Jaw height                       | 0.280 $\pm$ 0.024  | 0.267 $\pm$ 0.027    | T = -2.20      | 0.03    |
| Nose length                      | 0.354 $\pm$ 0.013  | 0.332 $\pm$ 0.017    | T = -5.98      | <0.001  |
| Interpupil distance              | 0.259 $\pm$ 0.016  | 0.261 $\pm$ 0.016    | T = 0.624      | 0.534   |
| Face width                       | 0.617 $\pm$ 0.048  | 0.622 $\pm$ 0.040    | T = 0.527      | 0.599   |
| Eye height                       | 0.076 $\pm$ 0.005  | 0.088 $\pm$ 0.007    | T = 7.94       | <0.001  |
